# Supplementary material
Source: PubMed Central journal article supplement (PMC3638869)

Supplementary Figure 2.

A)

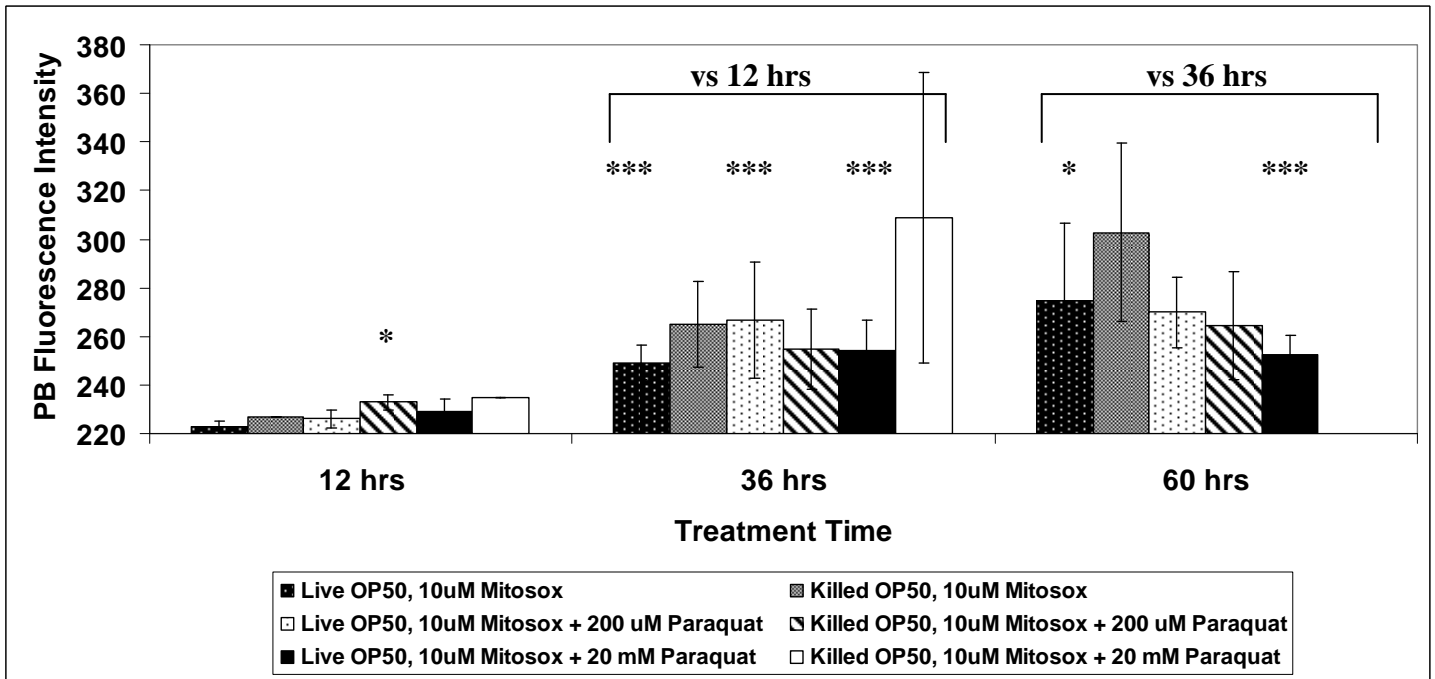

B)

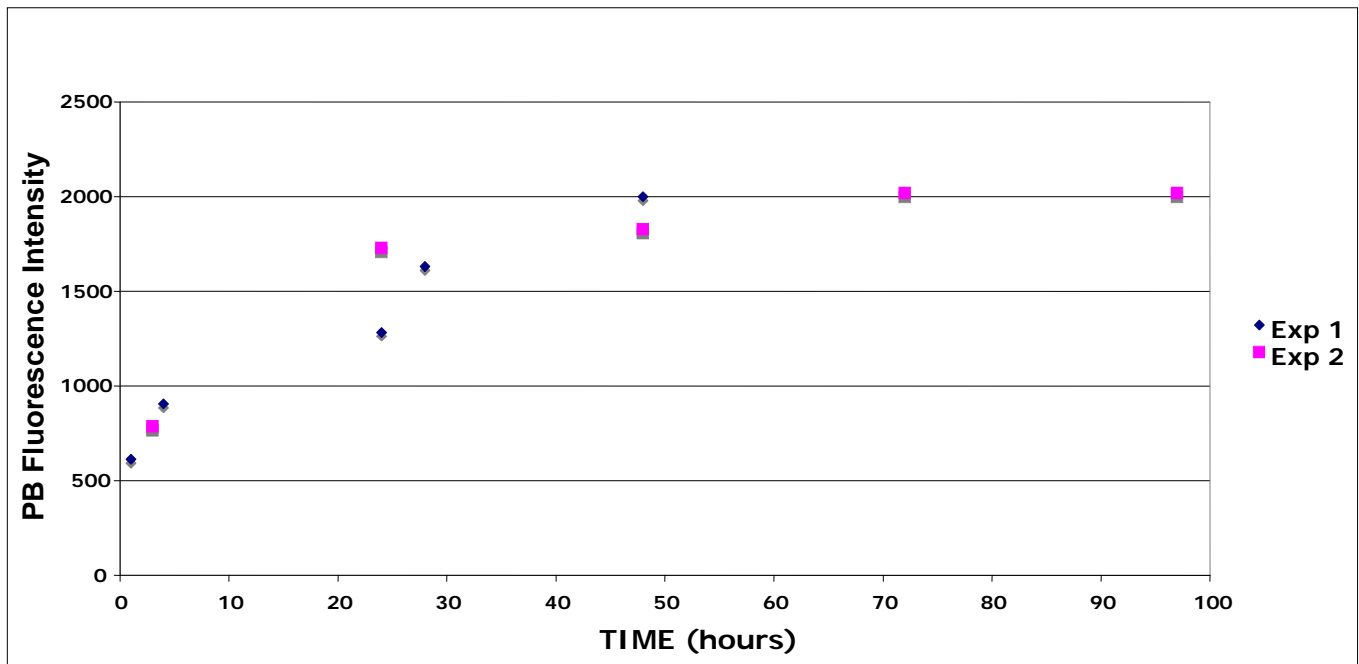

Supplement: NIHMS161750-supplement-Supplementary_Figure_2.pdf [file NIHMS161750-supplement-Supplementary_Figure_2.pdf]

Supplementary Figure 3.

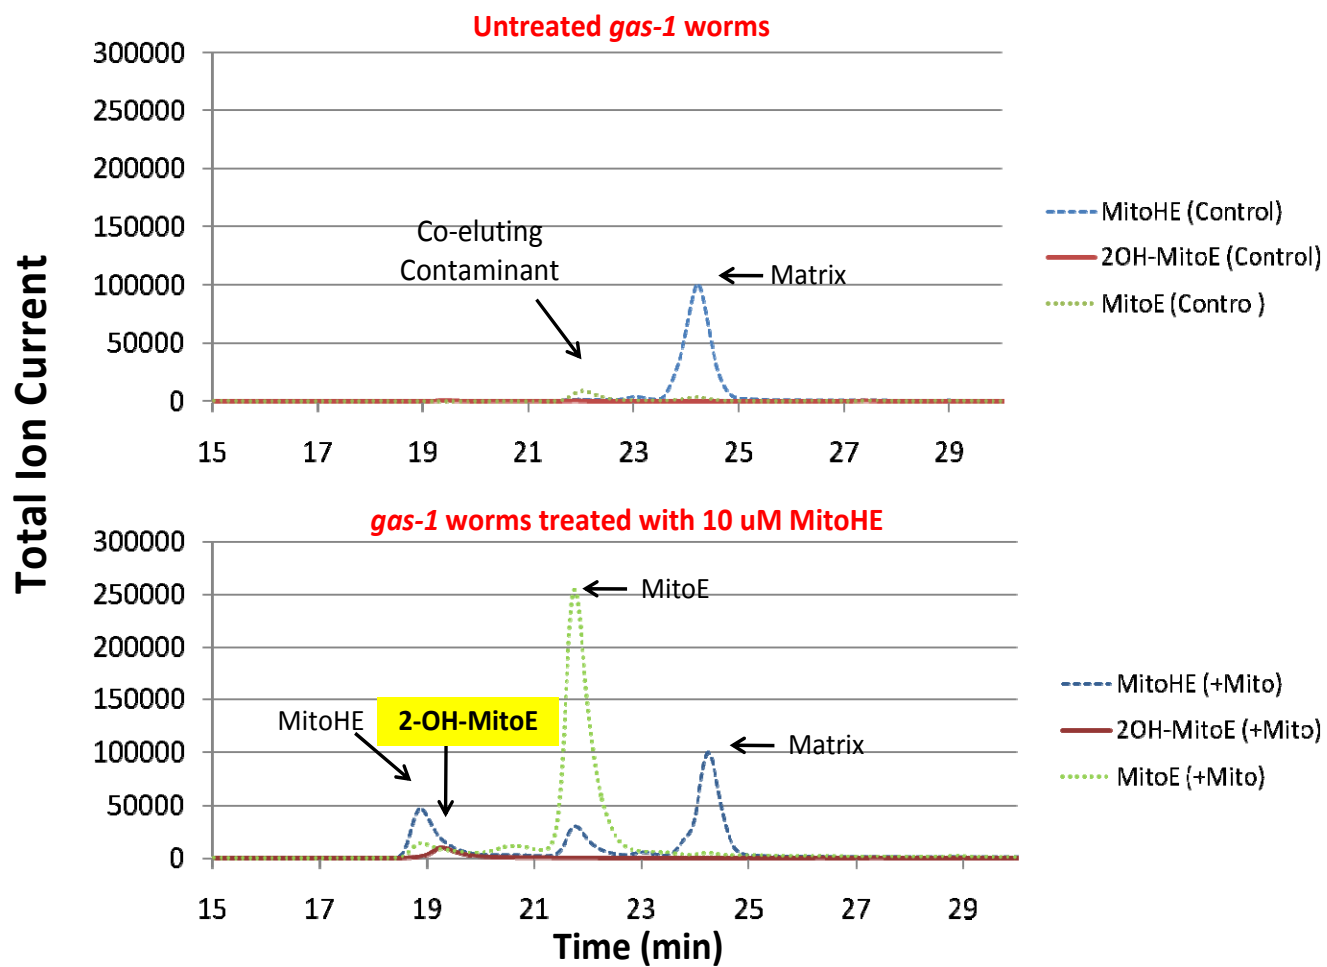

Supplement: NIHMS161750-supplement-Supplementary_Figure_3.pdf [file NIHMS161750-supplement-Supplementary_Figure_3.pdf]

Supplementary Figure 4.

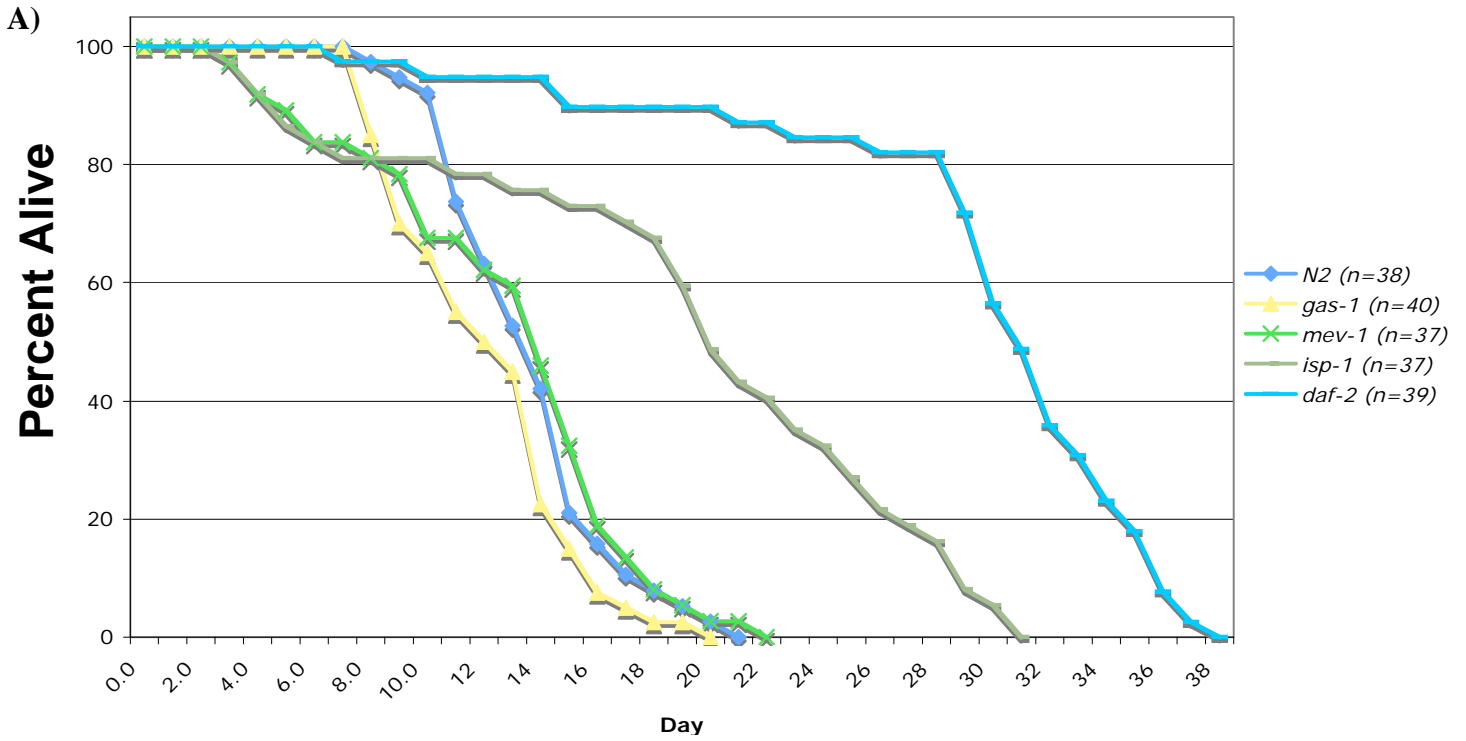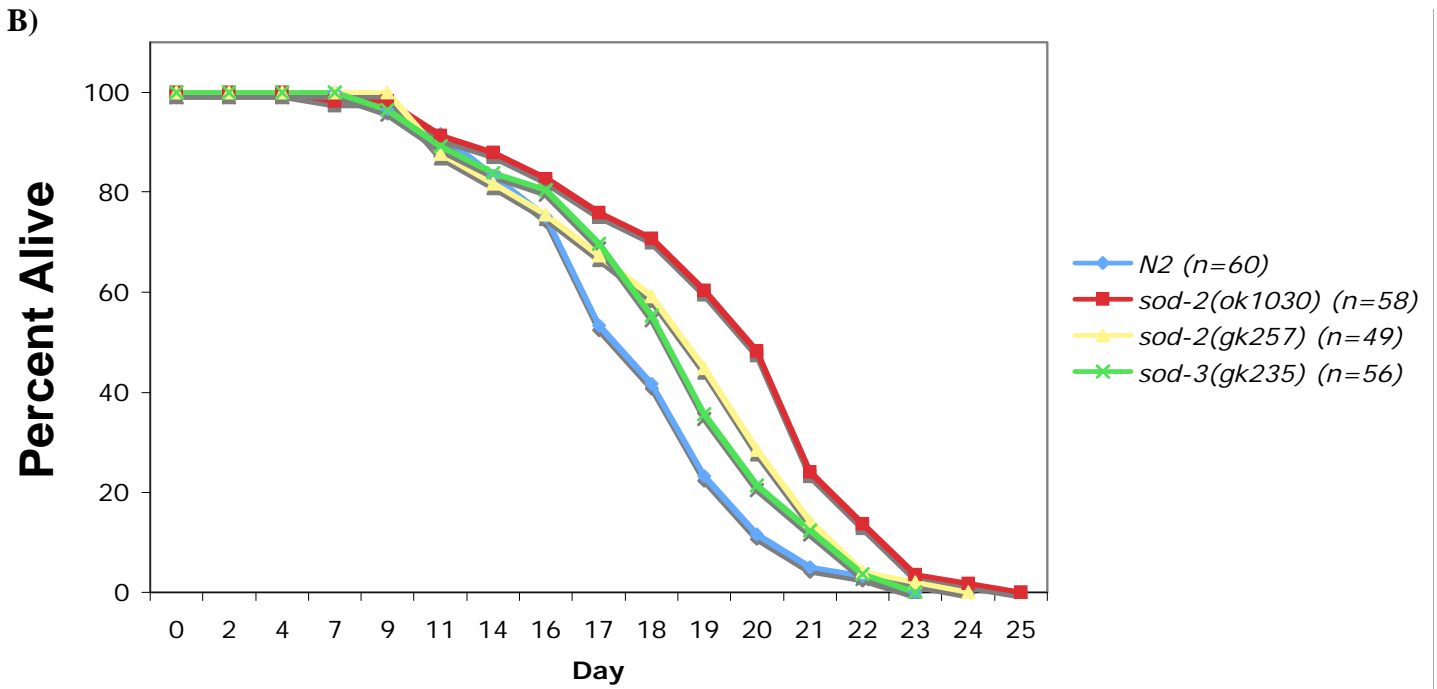

Supplement: NIHMS161750-supplement-Supplementary_Figure_4.pdf [file NIHMS161750-supplement-Supplementary_Figure_4.pdf]

Supplementary Figure 5.

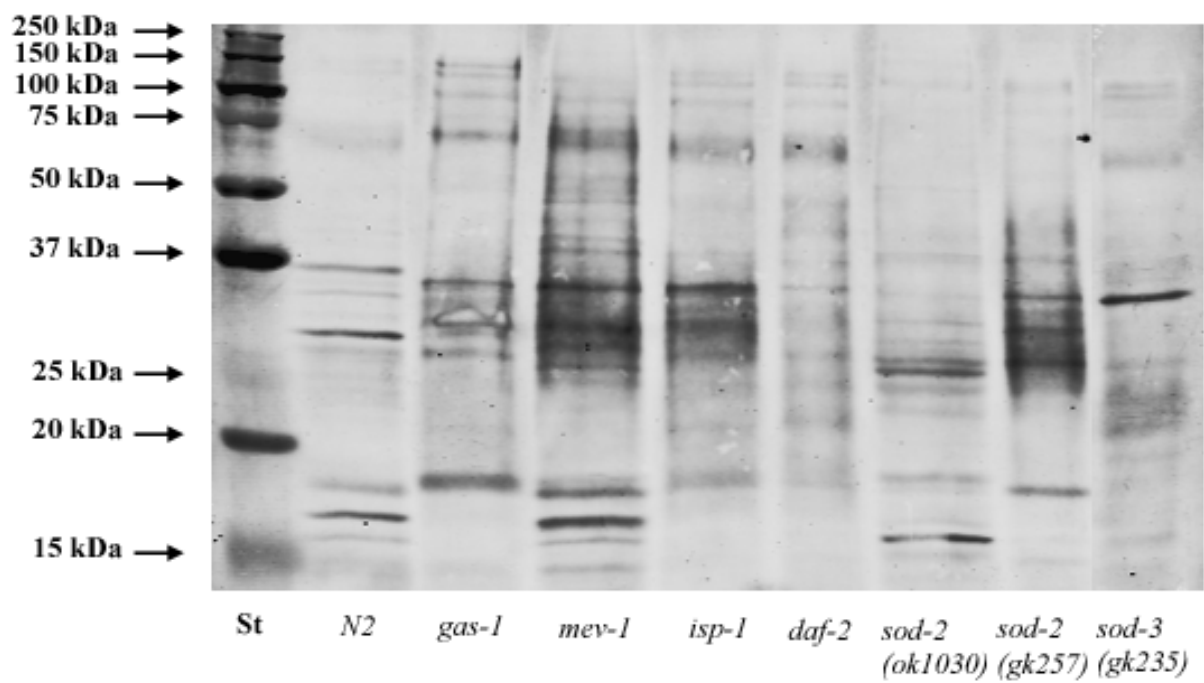

Supplement: NIHMS161750-supplement-Supplementary_Figure_5.pdf [file NIHMS161750-supplement-Supplementary_Figure_5.pdf]
